# Supplementary material for: Facile construction of a polypyrrole–cobalt sulfide counter electrode for low-cost dye-sensitized solar cells
Source: Royal Society of Chemistry journal article supplement (doi:10.1039/d1ra06946b), 2021-01-01
Supplement: d1ra06946b1.pdf [file d1ra06946b1.pdf]

## Supporting information

### Facile Construction of Polypyrrole-Cobalt Sulfide Counter Electrode for Low-cost Dye-sensitized Solar Cells

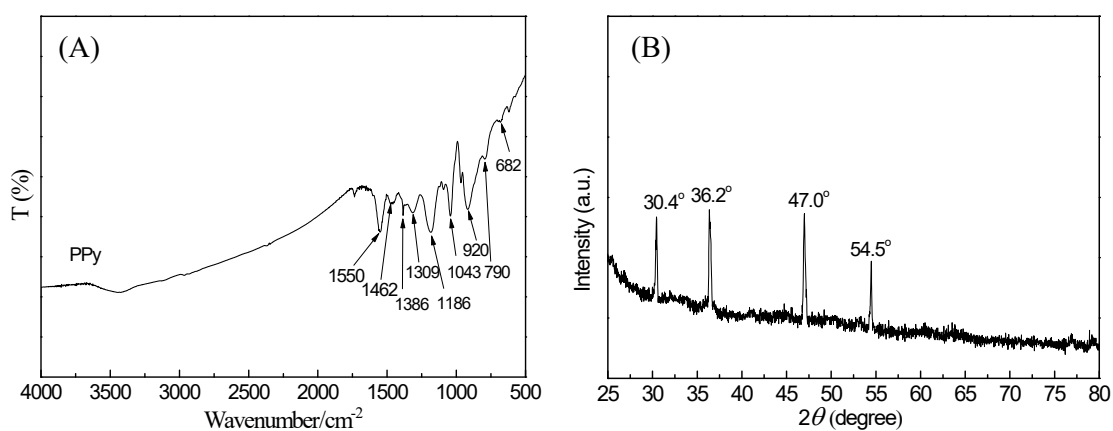

Fig. S1 The (A) FTIR spectra of PPy and (B) XRD patterns of CoS

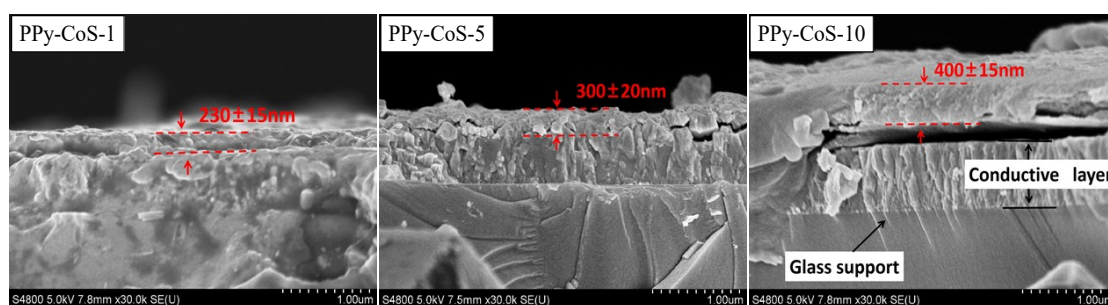

Fig. S2 The cross sectional morphology of PPy-CoS-1, PPy-CoS-5 and PPy-CoS-10
